# Supplementary material
Source: publisher figshare collection journal article supplement (https://frontiersin.figshare.com/ndownloader/files/22333395)

**Supplemental figure 1** Retention rates from the first wave of the study for the ADHD and control groups

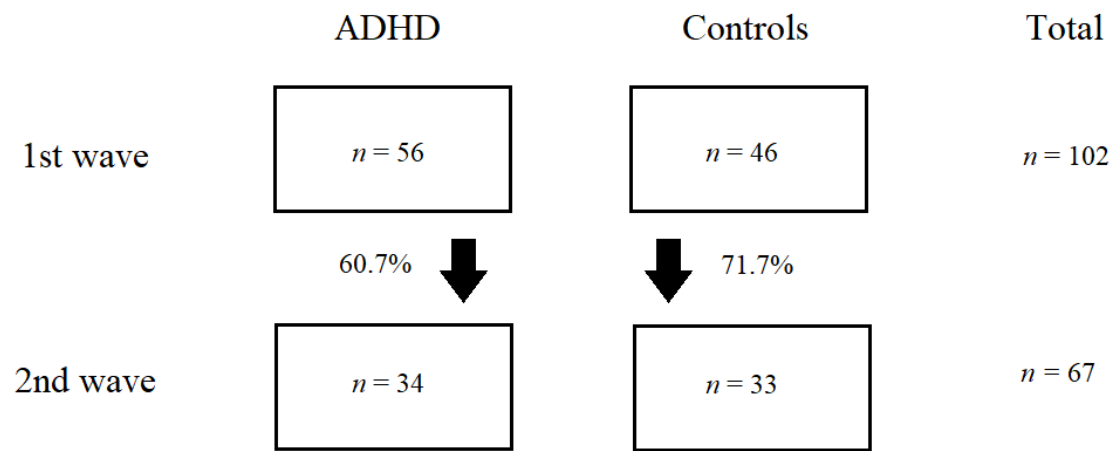

Supplement: Supplementary file [file 22333395]
